# Benthic jellyfish dominate water mixing in mangrove ecosystems

David M. Durieux, Kevin T. Du Clos, Brad J. Gemmell

November 8, 2019

# Significance Statement

Water mixing is a critical process for aquatic life. Coastal mangrove habitats are vital nurseries for many commercial and ecologically important species, but these highly sheltered habitats experience very little water mixing. The upside-down jellyfish, *Cassiopea* sp., occurs in mangrove habitats around the world at densities of up to 100 animals m<sup>-2</sup>. Each jellyfish lives on the bottom and pulses nearly continuously, producing a vertical current that transports hundreds of liters per hour of seawater. This results in turnover of the entire water column every 15 minutes in an average population. In addition, *Cassiopea* sp. can greatly expedite the release of nutrient-rich water from sediments and transport these nutrients into the water column. This study demonstrates that the upside-down jellyfish represents a previously unrecognized ecosystem engineer that can affect primary productivity, nutrient distribution, and alter new habitats as their range is expanding.

# Abstract

Water mixing is a critical mechanism in marine habitats that governs many important processes, including nutrient transport. Physical mechanisms, such as winds or tides, are primarily responsible for mixing effects in shallow coastal systems, but the sheltered habitats adjacent to mangroves experience very low turbulence and vertical mixing. The significance of animal mediated biogenic mixing in pelagic habitats has been investigated but remains unclear. In this study we show that the upside-down jellyfish *Cassiopea* sp. plays a significant role with respect to biogenic contributions to water column mixing within its natural habitat. The mixing contribution was determined by means of high-resolution flow velocimetry methods in both the laboratory and in the natural environment. We demonstrate that *Cassiopea* sp. continuously pumps water from the benthos upward in a vertical jet with flow velocities on the scale of centimeters per second. The volumetric flow rate was calculated to be 212 l h<sup>-1</sup> for average sized animals (8.6 cm bell diameter), which translates to turnover of the entire water column every 15 minutes for a median population density (29 animals m<sup>-2</sup>). In addition, we found *Cassiopea* sp. are capable of releasing porewater into the water column at an average rate of 2.64 ml h<sup>-1</sup>. The release of nutrient-rich benthic porewater combined with strong contributions to water column mixing, suggest a role for *Cassiopea* sp. as an ecosystem engineer in mangrove habitats.

# Introduction

Coastal mangrove habitats exhibit exceptionally high productivity and provide many ecosystem services, including control of flooding, sedimentation, and nutrient input in surrounding areas (1). In addition, these habitats act as critical nursery habitat for early life stages of a wide range of commercially and ecologically important species of fish and crustaceans (2, 3) and as adult habitat for many others (3). Mixing of the water column is a critical process in this habitat which regulates important processes such as productivity (4) and benthic-pelagic coupling (5), prey encounter rate (6), and gas exchange (7). Thus, it is important to identify and understand the major sources of mixing in these aquatic environments. Mixing forces are generally

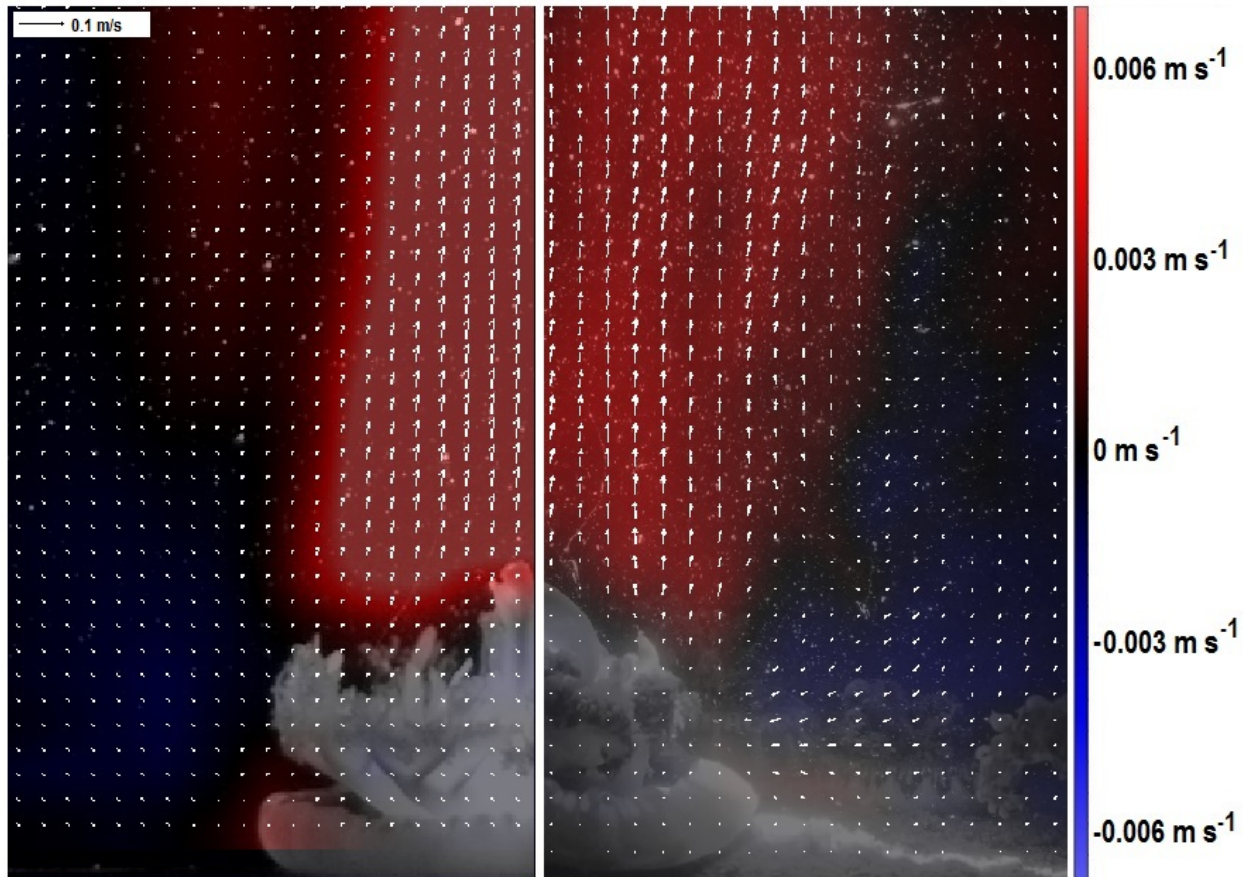

Figure 1: Laboratory (left) and in-situ (right) Particle Image Velocimetry (PIV) of a representative *Cassiopea* sp. jet. White arrows represent the velocity vectors while colored areas represent the flow with either an upward (red) or downward (blue) component.

environmental, such as wind or tides, but in some cases they can have a biotic origin. Biogenic mixing may be of particular importance in mangrove ecosystems, as these habitats experience comparatively little physical mixing due to wind or tidal flow (8).

Previous studies have explored the role of biogenic mixing contributions of several taxa, including pelagic jellyfish, fish, and krill in the water column (9, 10), as well as benthic bivalves (11). These studies demonstrate the potential for non-trivial levels of animal-mediated mixing even in unsheltered environments. While the primary source of turbulent mixing in shallow coastal ecosystems is wind-driven wave action (12), mangrove ecosystems provide shelter from wind and waves, as well as dampen mixing from tidal currents, which tend to run primarily in deeper channels within mangrove ecosystems. Therefore, physical mixing is naturally low in *Cassiopea* sp. habitat, implying that animal-mediated mixing could have more substantial impacts in these environments.

The upside-down jellyfish, *Cassiopea* sp., has a nearly circumtropical distribution (13). They are found in shallow, low energy coastal environments, often dominated by the red mangrove, *Rhizophora mangle* (14) and have been previously documented at densities up to 31 animals  $m^{-2}$  or 20% benthic coverage (15). Their natural range is extensive, and is further

spreading as an invasive species due to anthropogenic introduction (16–18) and through natural range expansion due to rising ocean temperatures (17). In addition, the size and abundance of *Cassiopea* sp. have increased near anthropogenically disturbed habitats, where nutrients tend to be elevated (19).

Unlike most other jellyfish, *Cassiopea* sp. exhibit an epibenthic lifestyle, with their bell on the substrate and oral arms facing upwards. They pulse their bells nearly continuously producing a vertical jet that has been previously documented (20–22), however the extent of this vertical jet and volumetric flux have not been fully quantified. The direction of flow and volumetric fluxes may be particularly noteworthy given the fact that in the absence of *Cassiopea* sp. there is a downward flux of nutrients with the sediments acting nutrient sink in sheltered mangrove habitats (23). Thus, an upward pump at the benthos may serve to alter this flux and also interact with interstitial porewater, pulling a fraction of this water into the water column (22) and potentially altering local productivity.

In this study, we quantify the large-scale flow features of individual *Cassiopea* sp. as well as flows created by small groups both in the laboratory and in the field. We discuss the results in the context of environmental mixing in mangrove ecosystems and examine the role of biological pumping at the surface of the benthos with respect to the liberation of interstitial porewater from the sediments.

## Results

### Field Population

At our study site in the Florida Keys, USA, the density of the studied population of *Cassiopea* sp. ranged from 3 to 97 animals  $\text{m}^{-2}$ , with a median density of 29 animals  $\text{m}^{-2}$  (fig. 2). The sizes of these animals followed a Poisson distribution (fig. S1, Chi-Squared Test for Independence,  $p < .001$ ) with a mean of 11.3 cm oral arm diameter (OAD) and 8.6 cm resting bell diameter (RBD), and there is a linear relationship between OAD and RBD (fig. S2, eq. 1,  $n = 50$ ,  $R^2 = 0.9$ ). We calculated that animals with the observed average RBD of 8.6 cm have a wet weight of 56.5 g (fig. S2, eq. 2,  $n = 50$ ,  $R^2 = 0.99$ ) and a dry weight of 3.2 g (fig. S2, eq. 3,  $n = 31$ ,  $R^2 = 0.98$ ).

### Quantitative Description of the Vertical Jet

Particle Image Velocimetry (PIV) was performed on 9 *Cassiopea* sp. ranging in size from 4.8 cm to 14.5 cm RBD. Analysis of the shape of the jet produced by these animals showed that the jet diameter ( $D_j$ ), relative to resting bell diameter (RBD), spreads linearly as height ( $Z$ ) increases, (fig. S2, eq. 4, Linear regression:  $R^2 = 0.64$ ,  $p < 0.001$ ). Maximum velocity at each height showed a significant inverse relationship with height normalized to bell diameter (fig. S2, eq. 5, Linear regression:  $R^2 = 0.16$ ,  $p < 0.001$ ). Our regression predicts a mean velocity of  $20 \text{ mm s}^{-1}$  at ground level regardless of animal size, but the rate of water speed slowing above this height decreased as animal size increased. Assuming calm conditions in the field, we find that for the average-sized animal (RBD = 8.6 cm) the jet would slow to  $0.5 \text{ mm s}^{-1}$  at a height of 6.4 meters. Since *Cassiopea* sp. in this study were found only between 0.5 and 2 m deep, it is assumed that the jets will reach the surface in their natural habitat. In-situ PIV confirmed that the

laboratory-based velocity measurements were accurate.

## Flux and Turnover Time

At a relative distance of two bell diameters above the animals, vertical velocity was found to be independent of bell diameter (Spearman's rank correlation,  $\rho = 0.233$ ,  $p = 0.551$ ), as was expected from the observation of jet shape. Because jet diameter was found to correlate directly with bell diameter (Spearman's rank correlation,  $\rho = 0.9$ ,  $p = 0.002$ ), and velocity was independent of bell diameter, vertical flux of water ( $Q$ ) was found to follow a power law function relative to resting bell diameter, with a power of 2.23 (fig. 2a; fig. S2, eq.6,  $n = 9$ ,  $R^2 = 0.74$ ). The relationship can also be expressed as weight-specific flux ( $F$ ) in terms of dry weight (fig. S2, eq. 7). Thus, an average-sized *Cassiopea* sp. moves  $212 \text{ l h}^{-1}$  of seawater, a mass-specific volumetric flow rate of  $62.9 \text{ l h}^{-1} \text{ g}^{-1}$  dry weight (DW).

Since *Cassiopea* sp. form aggregations in nature, a correction factor was needed to account for flow-related interactions between individuals. The jet of an individual *Cassiopea* sp. was examined under conditions with different numbers of neighbors, and the flux was found to decrease with the addition of each neighbor (fig. 2b; fig. S2, eq. 8). Based on to photographic transects of the field population in the Florida Keys, at the median density of  $29 \text{ animals m}^{-2}$ , each animal will have an average of 1.23 neighbors (fig. S2, eq. 9). Assuming a water depth of 1 meter and a vertical jet that reaches the surface, the turnover time for the water column was calculated. A single animal would turn over the water column over a square meter of benthos in 4.7 hours. At the observed median population of  $29 \text{ animals m}^{-2}$  the resulting flux is  $3980 \text{ l h}^{-1}$ , and the calculated turnover time is reduced to 15 minutes. Turnover time decreases as population density increases, to a minimum of 11.8 minutes at a density of  $64 \text{ animals m}^{-2}$  (Fig. 2c) at which point turnover time begins to increase due to increased competition.

## In Situ Flow Measurement

In the Lido Key site, acoustic doppler velocimetry demonstrated that *Cassiopea* sp. increase vertical transport of water in these habitats. Mean vertical velocity increased from  $2.1 \text{ mm s}^{-1}$  ( $\pm 1.4 \text{ mm s}^{-1}$  SD,  $n=7$ ) in the absence of jellyfish to  $3.3 \text{ mm s}^{-1}$  ( $\pm 2.25 \text{ mm s}^{-1}$  SD,  $n = 9$ ) directly over patches of jellyfish (Fig. 2d). This 57% increase in vertical flow represents a statistically significant difference (Unpaired T-test,  $df = 14$ ,  $p < 0.01$ ). Turbulent Kinetic Energy (TKE) 20-30 cm above the bottom near patches of *Cassiopea* sp. was  $4.5 \times 10^{-4} \text{ m}^2\text{s}^{-2}$  ( $\pm 3.96 \times 10^{-4} \text{ m}^2\text{s}^{-2}$  SD,  $n = 9$ ).

## Interstitial Water Release

Fluorescein dye concentrations increased visibly in the trials that included a jellyfish but not in controls. The ratio of absorbance at 494nm between  $t=3 \text{ h}$  and  $t=2 \text{ h}$  increased from  $1.02$  ( $\pm 0.07$  SD,  $n = 5$ ) to  $1.15$  ( $\pm 0.16$  SD,  $n = 9$ ) in the presence of a jellyfish. From this absorbance we calculated the average flow attributed to a single jellyfish, normalized to an RBD of 8.6 cm, which amounted to  $2.64 \text{ ml h}^{-1}$  ( $\pm 2.1 \text{ ml h}^{-1}$  SD,  $n = 9$ ) of interstitial water released into the water column (Fig. 3). Trials without jellyfish had no apparent fluorescein release. The flow rate in the presence of jellyfish was found to vary significantly from zero (1-Sample t-test,  $p =$

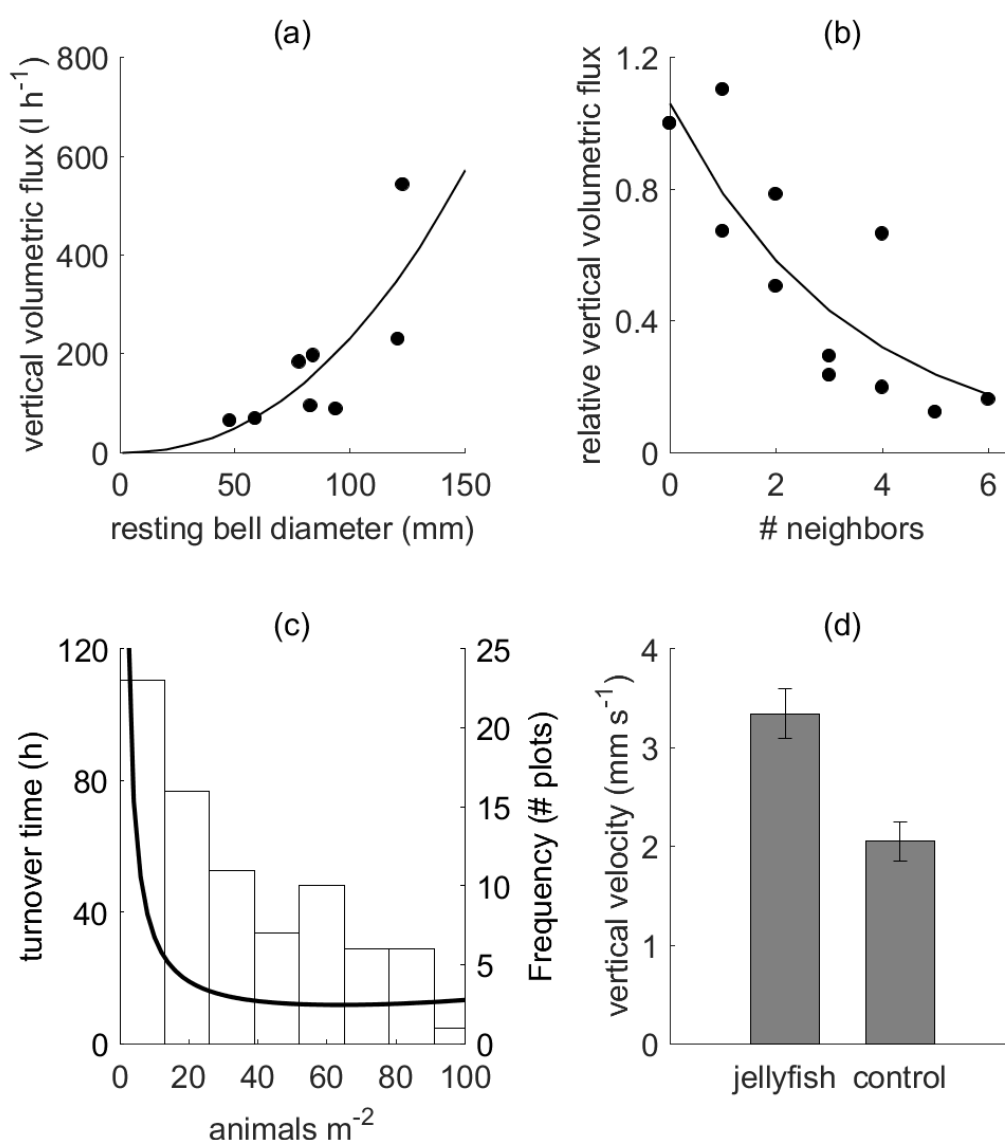

Figure 2: **(a)** Vertical flux of water increases exponentially and follows a power law relationship with animal size ( $R^2 = 0.732$ ,  $n = 9$ ). **(b)** The relative vertical flux, such that a value of one is equal to the amount an individual pumps in the absence of neighbors, decreases as the number of neighbors increases ( $R^2 = 0.74$ ,  $n = 12$ ). **(c)** Predicted time to turn over the column of water above a square-meter patch of *Cassiopea* sp. assuming a water depth of 1 meter, which was typical in our field site, relative to the population density in that patch. Frequency of different population densities observed is shown as a histogram of 1 m square plots. **(d)** Vertical flow component in the presence and absence of *Cassiopea* sp. at Lido Key, Florida. The presence of *Cassiopea* sp. significantly increased vertical flow (Unpaired t-test,  $p \leq 0.001$ )



Table 1: Estimated filtration rate per individual, as well as wet weight and dry-weight specific filtration rates for *Cassiopea* sp. (assuming a density of 29 animals m<sup>-2</sup>), *Crassostrea virginica*, *Mytilus edulis*, and *Ciona intestinalis*. Note: Rates for *Cassiopea* sp. are consistently an order of magnitude larger than those of bivalves. Citations refer to sources of filtration rates and size conversion factors used to calculate these values.

|                                         | <b>Filtration Rate (l h<sup>-1</sup>)</b> | <b>WW-Specific Filtration Rate (l h<sup>-1</sup> g<sup>-1</sup>)</b> | <b>DW-Specific Filtration Rate (l h<sup>-1</sup> g<sup>-1</sup>)</b> |
|-----------------------------------------|-------------------------------------------|----------------------------------------------------------------------|----------------------------------------------------------------------|
| <i>Cassiopea</i> sp.<br>(Current Study) | 137                                       | 2.43                                                                 | 42.89                                                                |
| <i>Crassostrea virginica</i>            | 2.61<br>(24, 25)                          | 0.71<br>(25, 26)                                                     | 6.41<br>(25)                                                         |
| <i>Mytilus edulis</i>                   | 11.9<br>(11)                              | 0.80<br>(11, 27, 28)                                                 | 5.94<br>(11, 28)                                                     |
| <i>Ciona intestinalis</i>               | 0.1 to 1<br>(29)                          | 1.16 to 1.57<br>(29, 30)                                             | 24<br>(30)                                                           |

0.0055). Interstitial water release rate increased linearly with bell diameter. (Fig. 3, n = 9, R<sup>2</sup> = 0.3622).

## Discussion

In many coastal ecosystems, wind and tidal flow are the primary mixing forces (12). However, the ecosystems inhabited by *Cassiopea* sp. are sheltered by dense stands of *Rhizophora* mangrove trees, reducing wind-water interaction in these lagoons and estuaries. In addition, *Cassiopea* sp. dwell outside of the tidal channels, where most tidal flushing in these habitats occurs (8), residing instead on the adjacent flats. Together, these two habitat features result in a system with comparatively little physical mixing. Further evidence of the quiescent nature of this habitat is given by the presence of a fine-grain benthic substrate in the areas where *Cassiopea* sp. are abundant (31). Our results from field measurements near *Cassiopea* sp. habitats found turbulent kinetic energy (TKE) values comparable to previously reported measurements (32) from mangrove habitats confirming that environmental flows in which *Cassiopea* sp. are found are low, with little turbulent mixing. As such, the cumulative effect of a population of *Cassiopea* sp. has the potential to provide a large contribution to mixing, relative to non-biogenic factors, which would have important ecological implications.

Our measurements show that the average animal has the potential to produce a jet on the order of several meters tall, which would certainly affect the entire depth of the water column (0.5 m to 2 m) in the shallow ecosystem where *Cassiopea* sp. occur. Our results indicate that an individual average-sized animal can move 212 l h<sup>-1</sup> of seawater upward in its vertical jet (Fig. 2a). After factoring in the effect of neighboring animals, our model predicts that the median population density observed in our field site (29 animals m<sup>-2</sup>) can turn over a 1 m deep column every 15 minutes (fig. 2c). This biogenic contribution to environmental mixing is higher than any

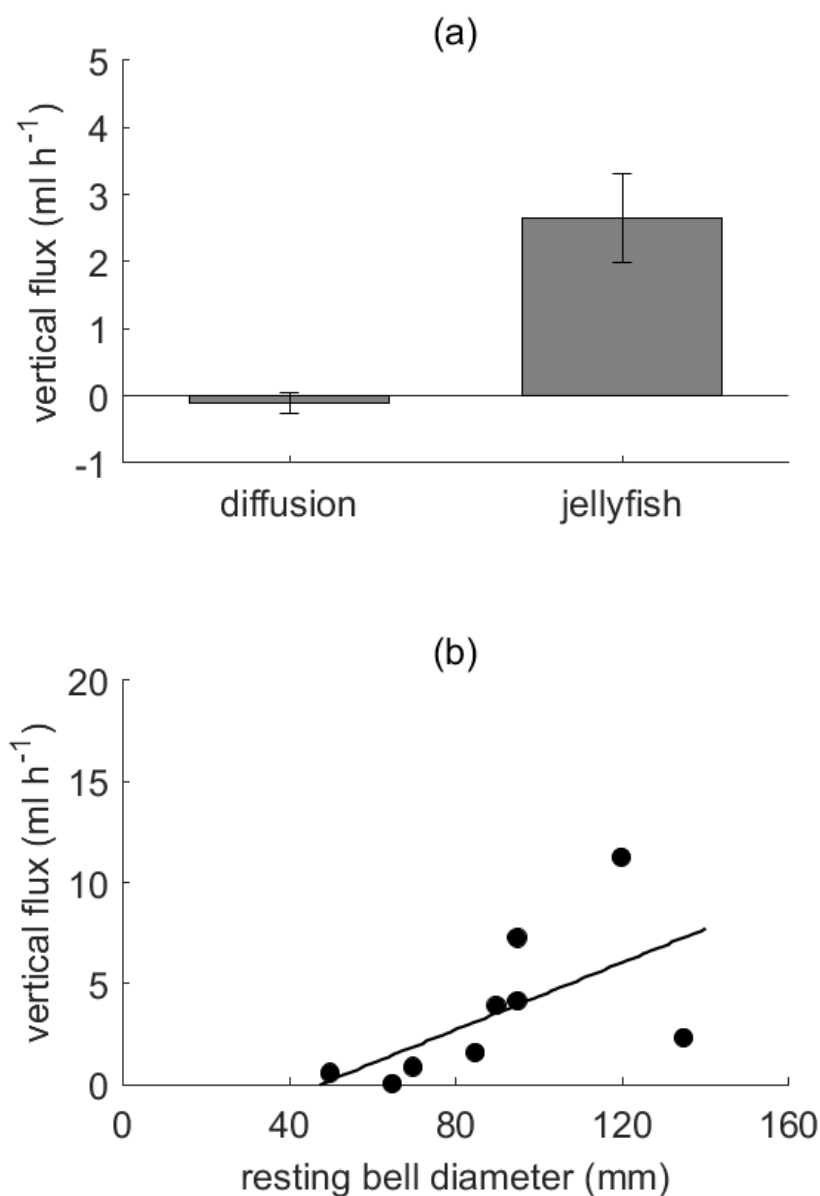

Figure 3: **(a)** Vertical flux of interstitial water out of the sediment attributed to a single *Cassiopea* sp., normalized to a resting bell diameter of 8.6 cm (the average observed in the field), compared to the rate due to diffusion in the experimental container. Interstitial water release due to diffusion was negligible, while the average *Cassiopea* sp. released 2.6 ml h<sup>-1</sup>. **(b)** Vertical flux of interstitial water relative to bell diameter. As animal size increased, the interstitial flow increased as well ( $n = 9$ ,  $R^2 = 0.3622$ ).



other known epibenthic species (Table 1).

For comparison (Table 1), the mussel *Mytilus edulis* has been observed to pump  $6.4 - 11.9 \text{ l h}^{-1}$  and the oyster *Crassostrea virginica* has been calculated to pump  $2.61 \text{ l h}^{-1}$ , in both cases two orders of magnitude below the rates measured in *Cassiopea* sp. in this study. To account for differences in body mass and body water content, since individual jellyfish are larger than mussels, dry weight-specific filtration rates can also be compared (Table 1). The eastern oyster *Crassostrea virginica* moves  $6.4 \text{ l h}^{-1} \text{ g}^{-1}$  dry weight and *M. edulis* pumps  $5.94 \text{ l h}^{-1} \text{ g}^{-1}$  dry weight. By comparison, *Cassiopea* sp. exhibit volumetric flow rates an order of magnitude higher than these bivalves by dry weight. Therefore, per unit of biomass, *Cassiopea* sp. act as much more effective water pumps than do bivalves. Weight-specific filtration rates have also been calculated for the tunicate *Ciona intestinalis*, at  $24 \text{ l h}^{-1} \text{ g}^{-1}$  dry weight. This puts the pumping rate of tunicates at a level closer to that of *Cassiopea* sp., likely due to the fact that it, like *Cassiopea* sp., has a high water content, its dry weight being 15-20 times less than its wet weight. However, due to the much smaller size of *C. intestinalis*, they move a lower magnitude of water than *Cassiopea* sp. overall.

Of course, animals such as oysters and mussels can occur at much higher densities than *Cassiopea* sp. do, but their relatively small individual flow is not fully compensated for in terms of numbers. High densities of over  $700 \text{ animals m}^{-2}$  have been reported for both *Mytilus edulis* (33) and *Crassostrea virginica* (24). Assuming adult ( $0.3 \text{ g}$  dry weight (24)) oysters and additive contributions (a likely overestimate) this would produce approximately  $1176 \text{ l h}^{-1} \text{ m}^{-2}$  flow. For mussels (28) and the same assumptions, we calculate a flow of  $3443 \text{ l h}^{-1} \text{ m}^{-2}$ . The tunicate *Ciona intestinalis* was found to pump water at rates of  $0.1$  to  $1 \text{ l h}^{-1}$  (29). This species, has been recorded at densities of over  $1000 \text{ individuals m}^{-2}$  (34) for have a population filtration rate on the order of  $1000 \text{ l h}^{-1} \text{ m}^{-2}$ . Our median population of *Cassiopea* sp. ( $29 \text{ animals m}^{-2}$ ) moved  $3980 \text{ l h}^{-1} \text{ m}^{-2}$ , while the maximum density observed in this study moved  $4569 \text{ l h}^{-1} \text{ m}^{-2}$ . Thus, *Cassiopea* sp. populations, despite their lower population densities, are responsible for much greater amounts of water transport than are bivalve reefs or tunicate colonies. In addition, *Cassiopea* sp., unlike other biological pumps that are smaller, are capable of producing jets which reach the surface of the water (fig. S2, eq. 5). Other, smaller pumps are much more limited in the extent of their influence, with *M. edulis* jets decomposing within  $5 \text{ cm}$  of the bottom (35). The result of this difference in extent is that *Cassiopea* sp. is able to turn over the entire water column, while bivalves and other smaller organisms mix only the lower strata.

This effect on turnover rates by *Cassiopea* sp. has implications for several ecosystem processes. An increase in mixing, especially in upward vertical transport, could lead to a decrease in sedimentation in low-energy habitats. Particulates in mangrove habitats flocculate, increasing particle size, but the low density of these flocs reduces sedimentation rate (36). *Cassiopea* sp. themselves may contribute to flocculation by the production of mucus (15), which traps suspended particles (36). These particles may be further prevented from settling by addition of mixing energy from *Cassiopea* sp. thereby increasing the export of nutrients from mangrove ecosystems to neighboring systems such as coral reefs and seagrass beds. Another important consideration for *Cassiopea* sp. mediated biogenic mixing is that the strongest flows are generated near the benthos. This is in contrast to wind-driven mixing in which the strongest flows are at the surface and may have important implications for productivity in these habitats. For example, a mesocosm study where mixing was initiated close to the bottom, as is the case with *Cassiopea* sp., found that faster turnover resulted in longer-lasting algae blooms and higher

chlorophyll concentrations than at lower mixing rates (6), likely because of the increased availability of nutrients from the sediment to phytoplankton cells. In addition, the accelerated exchange of water near the benthos to the surface in the presence of *Cassiopea* sp. may affect oxygen and CO<sub>2</sub> exchange rates at the surface, affecting carbonate pH buffering, respiration rates, and primary productivity throughout the water column.

It has been previously demonstrated that *Cassiopea* sp. can transport interstitial porewater in sediments from several cm deep in the benthos to the water column (22) but volume fluxes were not measured and thus the potential impact on the local ecosystem is unknown. In Gulf of Mexico sediments, increasing the advective benthic flow produced an increase in denitrification rates (37) so it is possible that in areas where *Cassiopea* sp. is abundant, it may also contribute to increased denitrification. Additionally, increased flow alters the redox gradient in benthic sediments and microbial diversity (38). Our results show that while over the course of the experiment (3 hours), diffusion released negligible amounts of benthic porewater, an average-sized animal (8.6 cm) would release approximately 2.6 ml h<sup>-1</sup> of porewater (fig. 3), and the median population of 29 animals m<sup>-2</sup> would therefore release 1809.6 ml day<sup>-1</sup> m<sup>-2</sup>. Given that these animals tend to move slowly over the bottom (Durieux et al. unpublished data), thereby encountering new sediments regularly, and the reported phosphate and nitrogen concentrations in the sediment (39) at Long Key, Florida, the action of *Cassiopea* sp. could release roughly 0.34 mg day<sup>-1</sup> m<sup>-2</sup> of NO<sub>3</sub>, 2.35 mg day<sup>-1</sup> m<sup>-2</sup> of NH<sub>4</sub>, and 1.03 mg day<sup>-1</sup> m<sup>-2</sup> of PO<sub>4</sub> at median population densities. Since these released nutrients will be mixed into the water column upon becoming entrained in the vertical jets and assuming a 1 m water depth, this represents an increase of 29% in water column NH<sub>4</sub>, a 6% increase in PO<sub>4</sub>, and a 0.5% increase in NO<sub>3</sub> relative to reported water column nutrient concentrations from these habitats (39). The addition of the mixing contribution produced by *Cassiopea* sp. into a habitat with low environmental water mixing, as well as a substantial release of interstitial water leading to an additional source of nutrients in this ecosystem, make it likely that *Cassiopea* sp. are previously unrecognized ecosystem engineers within mangrove habitats.

## Materials and Methods

### Field Population

The field study site on Long Key, Florida, USA (24.527 N, -80.814 W) was sheltered by red mangroves (*Rhizophora mangle*) and held a population of *Cassiopea* sp. at depths ranging from 0.5 to 2 m deep. The benthic habitat where *Cassiopea* sp. were most abundant consisted of very fine sediment, surrounded by seagrass (*Thalassia* and *Syringopodium*).

The population structure of a natural *Cassiopea* sp. population was quantified during December 2016, by setting two transects through the patch, 10 meters apart, parallel to one another in a roughly east-west orientation. Quadrats of 1 m<sup>2</sup> were sampled every 1.5 m on each transect to reduce investigator bias in selecting animals for measurement. Each quadrat was photographed from above, and the oral arm diameter (OAD) of each animal was measured from these images by measuring the longest observable distance from one oral arm tip to another oral arm tip. During the summer of 2017, fifty animals were collected and imaged from above and from the side. The resting bell diameter (RBD, used for lateral imaging) was measured during the

resting phase between bell contractions, and was correlated to the OAD, wet weight (WW), and dry weight (DW) by linear regression to allow conversion between measurements. Based on these parameters, populations of *Cassiopea* sp. at different densities were calculated.

## Vertical Jet Imaging

To determine the volumetric flow rate of vertical water movement, the vertical jet must first be described quantitatively. *Cassiopea* sp. of various sizes were collected from the Keys Marine Laboratory on Long Key, Florida, USA during the month of December, 2016 and August, 2017, and transported in collected seawater back to the University of South Florida, in Tampa, Florida, where they were housed in a 300 liter closed loop aquarium system. The animals were kept in artificial seawater mixed to a salinity of 35‰ with Instant Ocean aquarium salt, over a substrate of aragonite sand and high intensity metal halide lighting on a 12:12 light cycle.

The imaging setup consisted of a 45 x 45 x 45 cm aquarium, filled with artificial seawater at 35‰ salinity. The water was seeded using 10  $\mu$ m reflective hollow glass spheres for particle image velocimetry (PIV). An Edgertronic high-speed camera filming at 50 frames per second provided a field of view ca. 30 cm x 30 cm. Two 2-watt continuous wave DPSS lasers (wavelength = 520 nm), spread through cylindrical lenses to produce narrow light sheets, were staggered one above the other to illuminate a single coronal plane across the entire field of view. One jellyfish at a time ( $n = 9$ ) was placed on the bottom in the center of the aquarium, such that the laser sheet crossed the center of the animal. After allowing it to settle for about 10 minutes, 30 seconds of video were recorded at 50 frames per second. At least five such image sequences were made, and the three with the most similar pulse rates were retained for analysis using the LaVision software package, producing a PIV time-average over the 30 seconds. PIV was processed with interrogation windows between 48 and 64 pixels, at 50% overlap.

A custom MATLAB script was used to identify and measure the vertical jet from this time average. The location of the jet was defined as the region where the vertical velocity was greater than 0.5 mm s<sup>-1</sup>. This region was used to calculate the jet diameter. Due to the asymmetric meandering of the jet, volumetric flux was calculated by using a variant of the washer method. We integrate vertical velocity between the edges of the jet, using half-washers on each side of the position of maximum upward velocity (fig. 1). Because of the high degree of irregularity in *Cassiopea* sp. jets, the three image sequences of each animal were combined to create a single representative jet by taking the median values for jet diameter, jet area, maximum and average  $V_z$ , and vertical volumetric flux ( $Q$ ) at each height for use in further analysis.

This method produces an artificial tapering of the jet shape towards its highest end due to the fixed velocity threshold, since the maximum velocity of the jet approaches the minimum threshold as it slows with increasing height. To account for this, data above the height of the maximum measured jet diameter were excluded. In addition, the development region of a turbulent jet does not follow the same patterns as the fully developed region (40). To take this into account, the lowest data points were excluded so that the data series always began at a local maximum in  $V_z$ .

For confirmation of the laboratory results, in-situ PIV was performed at the field site. A Nikon D750 DSLR at 50 frames per second camera in an underwater housing was lined up the bottom near an individual *Cassiopea* sp. with a green laser, spread through a cylindrical lens, also housed in a water-tight case. PIV analysis using the naturally-occurring particles was performed

using DaVis, and the time-averaged velocities compared to those measured in the laboratory.

## Quantitative Description of the Vertical Jet

Upward velocity ( $V_z$ ) was expected to show an inverse relationship (40) with height ( $Z$ ) relative to resting bell diameter (RBD) (fig. S2, eq. 10). In addition, the jet diameter ( $D_j$ ) relative to RBD was hypothesized to increase linearly over this region (40) (fig. S2, eq. 11). Vertical volumetric flux ( $Q$ ) was expected to increase linearly with height, due to entrainment of water into the turbulent jet, and increase linearly with animal size (40). The resulting equation is a function of average velocity and jet diameter (fig. S2, eq. 12). These relationships were tested using the Nonlinear Regression tool in SPSS statistical software version 23.

To confirm that *Cassiopea* sp. in the field produce the same vertical jet as animals in a captive setting, in-situ PIV was performed on an animal at the Keys Marine lab, and the parameters of this jet were compared to those captured in the laboratory.

Weight-specific volumetric flow rates were calculated by calculating the expected flux of the animals used for morphological measurements, and then expressing this flux in terms of the wet and dry weights of those animals.

## Interactions Between Multiple Animals

Because *Cassiopea* sp. are often found in dense aggregations, we determined the degree of interference between adjacent animals using the same PIV design. A single animal was placed in the filming vessel, and then surrounded by an increasing number of neighbors. The vertical velocity and diameter of the original animal's jet were calculated as before, allowing us to determine the degree of inhibition caused by the addition of neighbors. This was compared to the number of neighbors expected in wild populations, determined from the same transect photos used to determine average animal size and population density.

## Turnover Time

The time needed for a *Cassiopea* sp. population to turn over the water column above it, where the jet reached the surface, was calculated by taking the volume of water above a 1 m<sup>2</sup> patch of a hypothetical *Cassiopea* sp. population and calculating the vertical volumetric flux for each animal in that population. The sum of the vertical flux rates ( $Q$ ) of the animals in this hypothetical patch is divided by the volume of water, giving the turnover rate (fig. S2, eq. 13).

## In Situ Flow Measurement

Flow velocities were measured around a population of *Cassiopea* sp. at Lido Key, Florida, (27.303 N, -82.566 W) using an Nortek Vector Acoustic Doppler Velocimeter (ADV), facing downward, suspended over the benthos with a focal region 20-30 cm above the bottom, sampling at a rate of 8 Hz. We deployed the ADV over areas with high *Cassiopea* sp. density, as well as in similar adjacent regions without *Cassiopea* sp.. The resulting velocity vectors were filtered to remove any vectors with velocity of over 10 cm/s, which was determined to be above the range

produced by both ambient flow and *Cassiopea* sp., according to our PIV data. This was done to remove signals from small fish that used the ADV mount as structure.

## Interstitial Water Release Rates

We labeled play sand by mixing it with a solution of fluorescein in artificial seawater until the sand was uniformly damp. A smooth layer of labeled sand 2.5-3 cm deep was added to the bottom of an 8 l plastic bucket in a larger water bath, capped with a ca. 1 cm deep layer of clean play sand mixed with seawater at a rate of 500 ml seawater to 2 l of dry sand, which delayed leaching of fluorescein into the water column by about 30 minutes. The bucket was then with 4 liters of artificial seawater without disturbance to the sand layers. Immediately after filling we took samples of interstitial and column water. A *Cassiopea* sp. specimen was then placed on the sand in the center of the bucket. For each day of experimentation, one trial was performed without a jellyfish to measure diffusion rates in the absence of animals. At two and three hours, the water column was sampled and the absorbance of this water at 494 nm was compared to a dilution curve of the interstitial water sample. The relative fluorescein concentrations at each time were corrected by subtracting both the measured concentrations of the starting water sample for the same trial (to control for unintentional fluorescein released during setup, and the concentration of the control experiment at the same time point (to control for diffusion). The change in these corrected values between two and three hours was then used to calculate the rate of interstitial water release into the water column.

## Acknowledgments

The authors would like to acknowledge the following people who assisted with specimen collection and experimentation (in alphabetical order): Olivia Blondheim, Alicia Durieux, Christian Fender, Olivia Hawkins, Kathrene Lo, Gabrielle Scrogam, Nils Tack. Additionally, we would like to thank the Keys Marine Laboratory for use of their facilities. Funding for this project was provided by the National Science Foundation (CBET-1511996, IDBR-1455471 and OCE-1829945 to B.J.G).



1. Gilbert AJ, Janssen R (1998) Use of environmental functions to communicate the values of a mangrove ecosystem under different management regimes. *Ecological Economics* 25:323–346.
2. Das S (2017) Ecological Restoration and Livelihood: Contribution of Planted Mangroves as Nursery and Habitat for Artisanal and Commercial Fishery. *World Development* 94:492–502.
3. Robertson AI, Duke NC (1987) Mangroves as nursery sites: comparisons of the abundance and species composition of fish and crustaceans in mangroves and other nearshore habitats in tropical Australia. *Marine Biology* 96:193–205.
4. Lawrence D, et al. (2004) Wind events and benthic pelagic coupling in a shallow subtropical bay in Florida. *Marine Ecology Progress Series* 266:1–13.
5. Ackerman JD, Loewen MR, Hamblin PF (2001) Benthic pelagic coupling over a zebra mussel reef in western Lake Erie. *Limnology and Oceanography* 46(4):892–904.
6. Petersen JE, Sanford LP, Kemp WM (1998) Coastal plankton responses to turbulent mixing in experimental ecosystems. *Marine Ecology Progress Series* 171:23–41.
7. Zappa CJ, et al. (2007) Environmental turbulent mixing controls on air-water gas exchange in marine and aquatic systems. *Geophysical Research Letters* 34(10):1–6.
8. Wolanski E, Mazda Y, Ridd P (2013) Mangrove Hydrodynamics in *Tropical Mangrove Ecosystems*, eds. Alongi AR, D.M. (American Geophysical Union) Vol. 41, pp. 43–62.
9. Katija K, Dabiri JO (2009) A viscosity-enhanced mechanism for biogenic ocean mixing. *Nature* 460(7255):624–626.
10. Huntley ME, Zhou M (2004) Influence of animal on turbulence in the sea. *Marine Ecology Progress Series* 273:65–79.
11. Riisgård HU, et al. (2011) The exhalant jet of mussels *Mytilus edulis*. *Marine Ecology Progress Series* 437(September):147–164.
12. Jones NL, Monismith SG (2008) Modeling the influence of wave-enhanced turbulence in a shallow tide- and wind-driven water column. *Journal of Geophysical Research: Oceans* 113(3):1–13.
13. Holland BS, Dawson MN, Crow GL, Hofmann DK (2004) Global phylogeography of *Cassiopea* (Scyphozoa: Rhizostomeae): Molecular evidence for cryptic species and multiple invasions of the Hawaiian Islands. *Marine Biology* 145(6):1119–1128.
14. Fleck J, Fitt WK (1999) Degrading mangrove leaves of *Rhizophora mangle* (Linne) provide a natural cue for settlement and metamorphosis of the upside down jellyfish *Cassiopea xamachana* (Bigelow). *Journal of Experimental Marine Biology and Ecology* 234(1):83–94.
15. Niggi W, Wild C (2010) Spatial distribution of the upside-down jellyfish *Cassiopea sp.* within fringing coral reef environments of the Northern Red Sea: Implications for its life cycle. *Helgolander Marine Research* 64(4):281–287.
16. Morandini AC, Stampar SN, Maronna MM, Da Silveira FL (2016) All non-indigenous species were introduced recently? The case study of *Cassiopea* (Cnidaria: Scyphozoa) in Brazilian waters. *Journal of the Marine Biological Association of the United Kingdom* 97(2):1–8.
17. Keable SJ, Ah Yong ST (2016) First Records of the Invasive Upside-down Jellyfish, *Cassiopea* (Cnidaria : Scyphozoa : Rhizostomeae : Cassiopeidae), from Coastal Lakes of New South Wales, Australia. *Records of the Australian Museum* 68:23–30.
18. Özgür E, Öztürk B (2008) A population of the alien jellyfish, *Cassiopea andromeda* (Forsskal, 1775) (Cnidaria: Scyphozoa: Rhizostomeae) in the Ölüdeniz Lagoon, Turkey. *Aquatic Invasions* 3(4):423–428.
19. Stoner EW, Layman CA, Yeager LA, Hassett HM (2011) Effects of anthropogenic disturbance on the abundance and size of epibenthic jellyfish *Cassiopea spp.* *Marine Pollution Bulletin* 62(5):1109–1114.
20. Hamlet CL, Miller LA, Rodriguez T, Santhanakrishnan A (2012) The fluid dynamics of feeding in the upside-down jellyfish. *Natural locomotion in fluids and on surfaces; swimming, flying and sliding (IMA)* 155:35–51.
21. Santhanakrishnan A, Dollinger M, Hamlet CL, Colin SP, Miller LA (2012) Flow structure and transport characteristics of feeding and exchange currents generated by upside-down *Cassiopea* jellyfish. *Journal of Experimental Biology* 215:2369–2381.
22. Jantzen C, Wild C, Rasheed M, El-Zibdah M, Richter C (2010) Enhanced pore-water nutrient fluxes by the upside-down jellyfish *Cassiopea sp.* in a Red Sea coral reef. *Marine Ecology Progress Series* 411:117–125.
23. Morell JM, Corredor JE (1993) Sediment Nitrogen trapping in a mangrove lagoon. *Estuarine, Coastal and Shelf Science* 37(2):203–212.
24. Mann R, Southworth M, Harding JM, Wesson JA (2009) Population Studies of the Native Eastern Oyster, *Crassostrea virginica*, (Gmelin, 1791) in the James River, Virginia, USA. *Journal of Shellfish Research* 28(2):193–220.
25. Newell RIE, Koch EW (2004) Modeling seagrass density and distribution in response to changes in turbidity stemming from bivalve filtration and seagrass sediment stabilization. *Estuaries* 27(5):793–806.
26. Mo C, Neilson B (1994) Standardization of oyster soft tissue dry weight measurements. *Water Research* 28(1):243–246.
27. Phillips DJH (1976) The common mussel *Mytilus edulis* as an indicator of pollution by zinc, cadmium, lead and copper. I. Effects of environmental variables on uptake of metals. *Marine Biology* 38(1):59–69.
28. Dare PJ, Edwards DB (1975) Seasonal changes in flesh weight and biochemical composition of mussels (*Mytilus edulis* L.) in the Conwy Estuary, North Wales. *Journal of Experimental Marine Biology and Ecology* 18(2):89–97.
29. Du Clos KT, Jones IT, Carrier TJ, Brady DC, Jumars PA (2017) Model-assisted measurements of suspension-feeding flow velocities. *The Journal of Experimental Biology* 220(11):2096–2107.
30. Petersen JK, Svane I (2002) Filtration rate in seven Scandinavian ascidians: Implications of the morphology of the gill sac. *Marine Biology* 140(2):397–402.
31. Leonard LA, Luther ME (1995) Flow hydrodynamics in tidal marsh canopies. *Limnology and Oceanography* 40(8):1474–1484.
32. Zhang X, Chua VP, Cheong HF (2015) Hydrodynamics in mangrove prop roots and their physical properties. *Journal of Hydro-Environment Research* 9(2):281–294.
33. McGrorty S, Clarke RT, Reading CJ, Goss-Custard JD (1990) Population dynamics of the mussel *Mytilus edulis*: density changes and regulation of the population in the Exe estuary, Devon. *Marine Ecology Progress Series* 67(Holm):157–169.
34. Svane I (1983) Ascidian reproductive patterns related to long-term population dynamics. *Sarsia* 68(4):249–255.
35. Van Duren LA, Herman PMJ, Sandee AJJ, Heip CHR (2006) Effects of mussel filtering activity on boundary layer structure. *Journal of Sea Research* 55(1):3–14.
36. Wolanski E (1995) Sediment transport in mangrove swamps. *Hydrobiologia* 295:31–42.
37. Gihring TM, Canion A, Riggs A, Huettel M, Kostka JE (2010) Denitrification in shallow, sublittoral Gulf of Mexico permeable sediments. *Limnology and Oceanography* 55(1):43–54.
38. Rosenberg R (2001) Marine benthic faunal successional stages and related sedimentary activity. *Scientia Marina* 65(SUPPLEMENT 2):107–119.
39. Szmant AM, Forrester A (1996) Water column and sediment nitrogen and phosphorus distribution patterns in the Florida Keys, USA. *Coral Reefs* 15(1):21–41.
40. Pope SB (2000) Free Shear Flows in *Turbulent Flows*. (Cambridge University Press), pp. 96–134.
